# Supplementary material
Source: ML conference proceedings conference paper supplement (https://openreview.net/forum?id=0hPkttoGAf)
Supplement: supplementary_material [file attachment]

## 6 Appendix

### 6.1 RL Bench Tasks

We provide a brief summary of the RL Bench tasks in Tab. 3. There are 18 tasks with 249 variations. For more detailed description of each task, please refer to PerAct [6], Appendix A.

| Task             | Language Template                                   | # of Variations |
|------------------|-----------------------------------------------------|-----------------|
| open drawer      | “open the __ drawer”                                | 3               |
| slide block      | “slide the __ block to target”                      | 4               |
| sweep to dustpan | “sweep dirt to the __ dustpan”                      | 2               |
| meat off grill   | “take the __ off the grill”                         | 2               |
| turn tap         | “turn __ tap”                                       | 2               |
| put in drawer    | “put the item in the __ drawer”                     | 3               |
| close jar        | “close the __ jar”                                  | 20              |
| drag stick       | “use the stick to drag the cube onto the __ target” | 20              |
| stack blocks     | “stack __ __ blocks”                                | 60              |
| screw bulb       | “screw in the __ light bulb”                        | 20              |
| put in safe      | “put the money away in the safe on the __ shelf”    | 3               |
| place wine       | “stack the wine bottle to the __ of the rack”       | 3               |
| put in cupboard  | “put the __ in the cupboard”                        | 9               |
| sort shape       | “put the __ in the shape sorter”                    | 5               |
| push buttons     | “push the __ button, [then the __ button]”          | 50              |
| insert peg       | “put the __ peg in the spoke”                       | 20              |
| stack cups       | “stack the other cups on top of the __ cup”         | 20              |
| place cups       | “place __ cups on the cup holder”                   | 3               |

Table 3: **Tasks in RL Bench** We evaluate on 18 RL Bench tasks which are same as those used in PerAct [6]. For more details, check see PerAct [6], Appendix A. For videos, visit <https://corlrvt.github.io/>

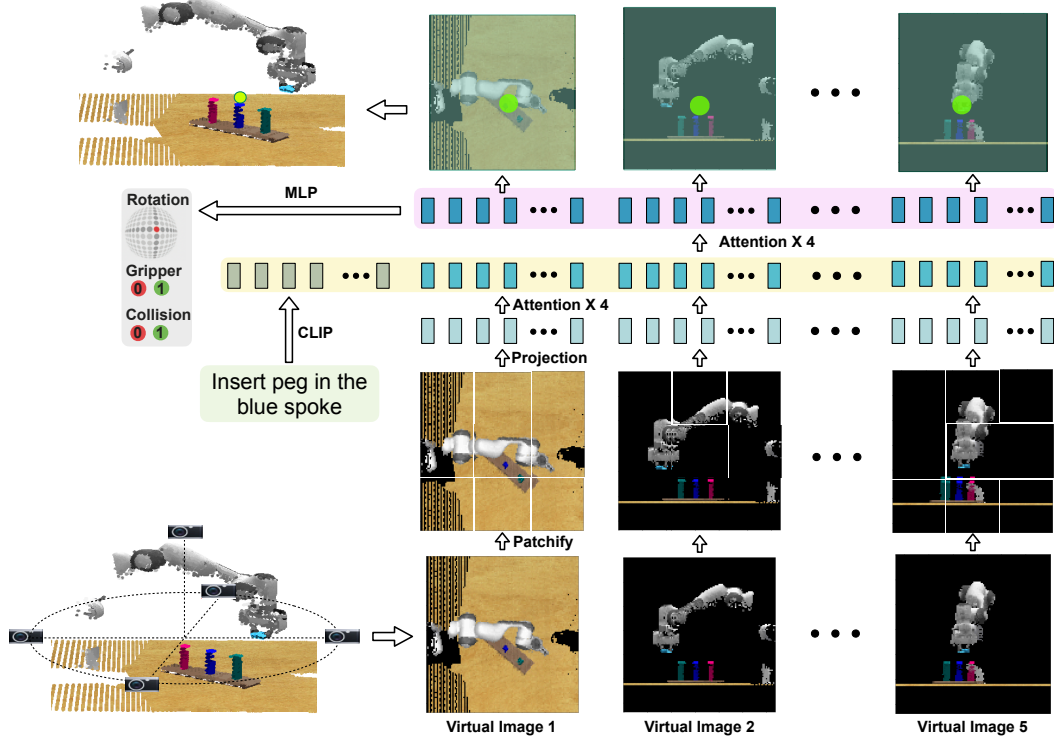

Figure 5: **Overview of the transformer used in RVT.** The input to the transformer is a language description of the task and virtual images of the scene point cloud. The text is converted into token embeddings using the pretrained CLIP [56] model, while the virtual images are converted into token embeddings via patchify and projection operations. For each virtual image, tokens belonging to the same image are processed via four attention layers. Finally, the processed image tokens as well as the language tokens are jointly processed using four attention layers. The 3D action is inferred using the resulting image tokens.

### 6.3 Ablations

We report the ablations mentioned in Tab. 2, along with the mean and standard deviations for each task Tab. 4.

| Im. Res. | View Corr. | Dep. Ch. | Bi-Lev. | Proj. Type | Rot. Aug. | Cam Loc. | # of View | Avg. Succ.  | Close Jar   | Drag Stick   | Insert Peg      | Meat off Grill | Open Drawer      | Place Cups |
|----------|------------|----------|---------|------------|-----------|----------|-----------|-------------|-------------|--------------|-----------------|----------------|------------------|------------|
| 220      | ✓          | ✓        | ✓       | Orth.      | ✓         | Cube     | 5         | <b>62.9</b> | 52 ± 2.5    | 99.2 ± 1.6   | 11.2 ± 3        | 88 ± 2.5       | 71.2 ± 6.9       | 4 ± 2.5    |
| 100      | ✓          | ✓        | ✓       | Orth.      | ✓         | Cube     | 5         | 51.1        | 60 ± 0      | 83 ± 1.7     | 4 ± 2.8         | 91 ± 3.3       | 67 ± 5.2         | 1 ± 1.7    |
| 220      | ✗          | ✓        | ✓       | Orth.      | ✓         | Cube     | 5         | 59.7        | 44 ± 0      | 100 ± 0      | 17 ± 4.4        | 90 ± 6         | 71 ± 9.1         | 7 ± 5.9    |
| 220      | ✓          | ✗        | ✓       | Orth.      | ✓         | Cube     | 5         | 60.3        | 37 ± 3.3    | 96 ± 0       | 11 ± 3.3        | 97 ± 1.7       | 57 ± 8.2         | 3 ± 3.3    |
| 220      | ✓          | ✓        | ✗       | Orth.      | ✓         | Cube     | 5         | 58.4        | 32 ± 7.5    | 96 ± 0       | 11 ± 3.3        | 90 ± 2         | 68 ± 2.8         | 2 ± 2      |
| 220      | ✓          | ✓        | ✓       | Pers.      | ✓         | Cube     | 5         | 40.2        | 20 ± 2.5    | 90.4 ± 2     | 4 ± 0           | 84.8 ± 4.7     | 13.6 ± 4.8       | 2.4 ± 2    |
| 220      | ✓          | ✓        | ✓       | Orth.      | ✗         | Cube     | 5         | 60.4        | 52 ± 0      | 92 ± 0       | 12.8 ± 1.6      | 97.6 ± 4.8     | 85.6 ± 5.4       | 0 ± 0      |
| 220      | ✓          | ✓        | ✓       | Orth.      | ✓         | Cube     | 3         | 60.2        | 44.8 ± 1.6  | 75.2 ± 4.7   | 15 ± 3.3        | 89.6 ± 4.1     | 68.8 ± 9.3       | 3.2 ± 1.6  |
| 220      | ✓          | ✓        | ✓       | Orth.      | ✓         | Front    | 1         | 35.8        | 36 ± 4.9    | 87 ± 1.7     | 2 ± 2           | 90 ± 6         | 58 ± 6.6         | 0 ± 0      |
| 220      | ✓          | ✓        | ✓       | Orth.      | ✓         | Rot. 15  | 5         | 59.9        | 48.8 ± 1.6  | 99.2 ± 1.6   | 12 ± 4.4        | 80 ± 2.5       | 71.2 ± 9.3       | 0 ± 0      |
| 220      | ✓          | ✓        | ✓       | Pers.      | ✗         | Real     | 4         | 10.4        | 14.4 ± 6.5  | 14.4 ± 5.4   | 0 ± 0           | 0 ± 0          | 22.4 ± 5.4       | 0 ± 0      |
| 220      | ✓          | ✓        | ✓       | Ortho.     | ✗         | Real     | 4         | 22.9        | 43.2 ± 4.7  | 54.4 ± 3.2   | 0 ± 0           | 0 ± 0          | 15.2 ± 5.3       | 0.8 ± 1.6  |
| Im. Res. | View Corr. | Dep. Ch. | Bi-Lev. | Proj. Type | Rot. Aug. | Cam Loc. | # of View | Avg. Succ.  | Place Wine  | Push Buttons | Put in Cupboard | Put in Drawer  | Put in Safe      | Screw Bulb |
| 220      | ✓          | ✓        | ✓       | Orth.      | ✓         | Cube     | 5         | <b>62.9</b> | 91 ± 5.2    | 100 ± 0      | 49.6 ± 3.2      | 88 ± 5.7       | 91.2 ± 3         | 48 ± 5.7   |
| 100      | ✓          | ✓        | ✓       | Orth.      | ✓         | Cube     | 5         | 51.1        | 38 ± 8.7    | 100 ± 0      | 49 ± 4.4        | 86 ± 2         | 77 ± 1.7         | 22 ± 4.5   |
| 220      | ✗          | ✓        | ✓       | Orth.      | ✓         | Cube     | 5         | 59.7        | 96 ± 2.8    | 99 ± 1.7     | 48 ± 6.9        | 50 ± 6         | 79 ± 5.9         | 36 ± 0     |
| 220      | ✓          | ✗        | ✓       | Orth.      | ✓         | Cube     | 5         | 60.3        | 71 ± 1.7    | 99 ± 1.7     | 56 ± 0          | 92 ± 4.9       | 77 ± 3.3         | 39 ± 4.4   |
| 220      | ✓          | ✓        | ✗       | Orth.      | ✓         | Cube     | 5         | 58.4        | 65 ± 5.2    | 100 ± 0      | 54 ± 2          | 94 ± 4.5       | 78 ± 3.5         | 48 ± 6.3   |
| 220      | ✓          | ✓        | ✓       | Pers.      | ✓         | Cube     | 5         | 40.2        | 28 ± 5.7    | 91.2 ± 1.6   | 26.4 ± 2        | 64.8 ± 3       | 51.2 ± 3.9       | 20 ± 4.4   |
| 220      | ✓          | ✓        | ✓       | Orth.      | ✗         | Cube     | 5         | 60.4        | 84 ± 3.6    | 96 ± 2.5     | 40 ± 2.5        | 88 ± 7.2       | 90.4 ± 4.1       | 48 ± 8.4   |
| 220      | ✓          | ✓        | ✓       | Orth.      | ✓         | Cube     | 3         | 60.2        | 84.8 ± 8.9  | 97.6 ± 2     | 40.8 ± 4.7      | 94.4 ± 4.1     | 82.4 ± 7.8       | 43.2 ± 3.9 |
| 220      | ✓          | ✓        | ✓       | Orth.      | ✓         | Front    | 1         | 35.8        | 82 ± 4.5    | 46 ± 2       | 14 ± 4.5        | 29 ± 7.1       | 57 ± 5.9         | 6 ± 2      |
| 220      | ✓          | ✓        | ✓       | Orth.      | ✓         | Rot. 15  | 5         | 59.9        | 74.4 ± 5.4  | 99.2 ± 1.6   | 46.4 ± 4.1      | 81.6 ± 2       | 80.8 ± 4.7       | 45.6 ± 4.8 |
| 220      | ✓          | ✓        | ✓       | Pers.      | ✗         | Real     | 4         | 10.4        | 11.2 ± 3.9  | 26.4 ± 4.1   | 0 ± 0           | 0 ± 0          | 0 ± 0            | 0 ± 0      |
| 220      | ✓          | ✓        | ✓       | Ortho.     | ✗         | Real     | 4         | 22.9        | 67.2 ± 5.9  | 76 ± 5.7     | 0 ± 0           | 0 ± 0          | 0 ± 0            | 0 ± 0      |
| Im. Res. | View Corr. | Dep. Ch. | Bi-Lev. | Proj. Type | Rot. Aug. | Cam Loc. | # of View | Avg. Succ.  | Slide Block | Sort Shape   | Stack Blocks    | Stack Cups     | Sweep to Dustpan | Turn Tap   |
| 220      | ✓          | ✓        | ✓       | Orth.      | ✓         | Cube     | 5         | <b>62.9</b> | 81.6 ± 5.4  | 36 ± 2.5     | 28.8 ± 3.9      | 26.4 ± 8.2     | 72 ± 0           | 93.6 ± 4.1 |
| 100      | ✓          | ✓        | ✓       | Orth.      | ✓         | Cube     | 5         | 51.1        | 93 ± 3.3    | 18 ± 2       | 17 ± 5.2        | 1 ± 1.7        | 36 ± 0           | 76 ± 2.8   |
| 220      | ✗          | ✓        | ✓       | Orth.      | ✓         | Cube     | 5         | 59.7        | 83 ± 1.7    | 41 ± 4.4     | 26.7 ± 5        | 20 ± 4.9       | 72 ± 0           | 95 ± 4.4   |
| 220      | ✓          | ✗        | ✓       | Orth.      | ✓         | Cube     | 5         | 60.3        | 72 ± 4      | 37 ± 5.2     | 23 ± 3.3        | 33 ± 5.9       | 92 ± 0           | 95 ± 4.4   |
| 220      | ✓          | ✓        | ✗       | Orth.      | ✓         | Cube     | 5         | 58.4        | 66 ± 6      | 31 ± 6.6     | 25 ± 3.3        | 29 ± 5.2       | 72 ± 0           | 91 ± 3.3   |
| 220      | ✓          | ✓        | ✓       | Pers.      | ✓         | Cube     | 5         | 40.2        | 88 ± 4.4    | 19.2 ± 4.7   | 22.4 ± 9        | 1.6 ± 2        | 16 ± 0           | 80.8 ± 3   |
| 220      | ✓          | ✓        | ✓       | Orth.      | ✗         | Cube     | 5         | 60.4        | 72.8 ± 1.6  | 25.6 ± 2     | 18.4 ± 6        | 8.8 ± 5.3      | 84 ± 0           | 92 ± 2.5   |
| 220      | ✓          | ✓        | ✓       | Orth.      | ✓         | Cube     | 3         | 60.2        | 95.2 ± 1.6  | 37.6 ± 4.1   | 29.6 ± 3.2      | 8.8 ± 4.7      | 80 ± 0           | 92.8 ± 3   |
| 220      | ✓          | ✓        | ✓       | Orth.      | ✓         | Front    | 1         | 35.8        | 42 ± 2      | 2 ± 2        | 0 ± 0           | 0 ± 0          | 0 ± 0            | 93 ± 5.2   |
| 220      | ✓          | ✓        | ✓       | Orth.      | ✓         | Rot. 15  | 5         | 59.9        | 83 ± 1.7    | 30.4 ± 5.4   | 46.4 ± 9.3      | 20.8 ± 4.7     | 64 ± 0           | 94.4 ± 3.2 |
| 220      | ✓          | ✓        | ✓       | Pers.      | ✗         | Real     | 4         | 10.4        | 37.6 ± 10.6 | 2.4 ± 3.2    | 0.8 ± 1.6       | 0 ± 0          | 0 ± 0            | 56.8 ± 6.9 |
| 220      | ✓          | ✓        | ✓       | Ortho.     | ✗         | Real     | 4         | 22.9        | 72.8 ± 3    | 7.2 ± 1.6    | 11.2 ± 4.7      | 0 ± 0          | 12 ± 0           | 53 ± 5.2   |

Table 4: Ablations results for RVT on RL Bench with metrics for each task.
